# Supplementary material
Source: publisher figshare collection journal article supplement (https://gsajournals.figshare.com/ndownloader/files/24126752)
Supplement: Supplementary file 1 [file 24126752]

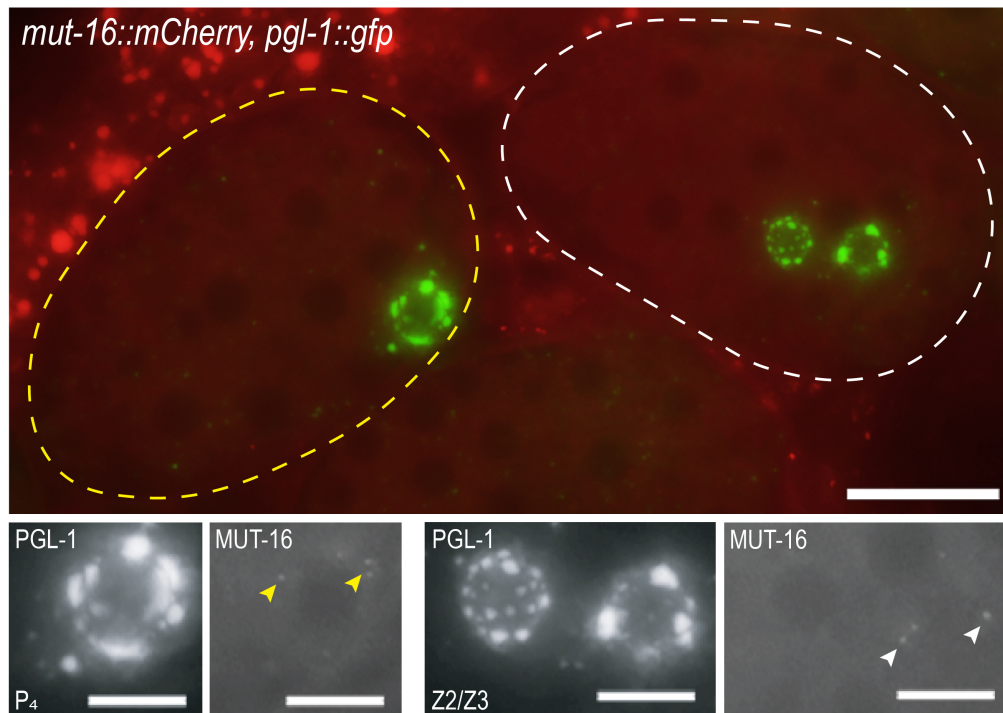

**Figure S1. *Mutator* foci are weakly present in the 30-cell stage.**

Live image of a 30-cell embryo (yellow outline) and 100-cell embryo (white outline) within an undissected *mut-16::mCherry; pgl-1::gfp* adult. PGL-1::GFP (green) granules associate with the P<sub>4</sub> and Z2/Z3 progenitor germ cells (insets). Small MUT-16::mCherry (red) puncta are visible in the P<sub>4</sub> cell of the 30-cell embryo (yellow arrowheads). MUT-16 foci are clearly visible in the 100-cell stage (white arrowheads). Image is a maximum intensity projection from five Z-stacks. Top scale bar, 15  $\mu$ m. Bottom scale bars, 5  $\mu$ m.
